# Supplementary material
Source: publisher site journal article supplement (https://www.dovepress.com/article/410756)
Supplement: Supplementary file 1 [file get_supplementary_file.php]

**A unique CD8<sup>+</sup>CD274<sup>+</sup> cell infiltration subgroup in hepatocellular carcinoma is associated with poor clinical outcomes**

**Supplementary Tables and Figures**

**Table. S1** List of clinical characteristics for our validation cohort.

| <b>Characteristic</b> |                                             | <b>Cases</b>  |
|-----------------------|---------------------------------------------|---------------|
|                       | CD8A <sup>High</sup> CD274 <sup>High*</sup> | 23            |
|                       | CD8A <sup>High</sup> CD274 <sup>Low*</sup>  | 23            |
|                       | CD8A <sup>Low</sup>                         | 34            |
| OS status             | Alive                                       | 54            |
|                       | Death                                       | 26            |
| RFS status            | None-recurrence                             | 29            |
|                       | Recurrence                                  | 51            |
| TNM Stage             | I-II                                        | 59            |
|                       | III-IV                                      | 21            |
| Grade                 | I-II                                        | 39            |
|                       | III-IV                                      | 41            |
| Age                   | Median                                      | 60 (year old) |
| Gender                | Female                                      | 16            |
|                       | Male                                        | 64            |

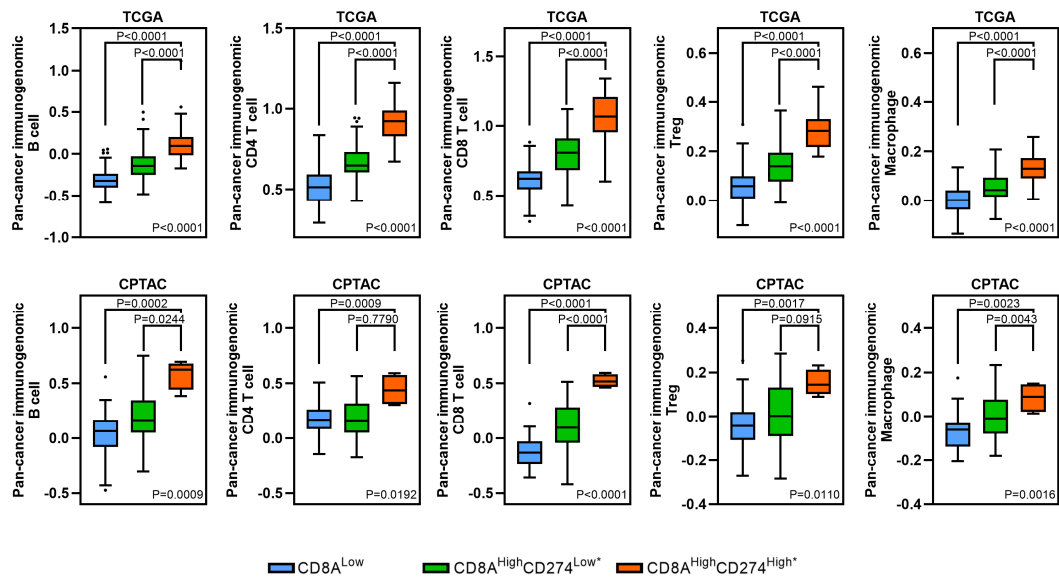

**Fig.S1** Boxplots showing the major immune cell infiltrates based on Pan-cancer immunogenomic analysis signature for each CD8A/CD274 subtype in TCGA and CPTAC protein HCC cohorts.

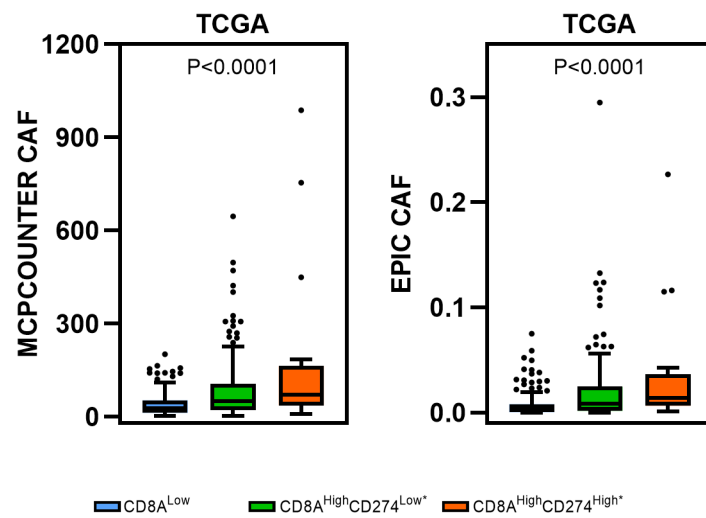

**Fig.S2** Boxplots showing the CAF infiltrates based on MCPCOUNTER and EPIC for each CD8A/CD274 subtype in TCGA and CPTAC protein HCC cohorts.
